# Supplementary material
Source: PubMed Central journal article supplement (PMC9724906)
Supplement: EIJ-D-20-01092_Gallinoro_SD.pdf [file EIJ-D-20-01092_Gallinoro_SD.pdf]

**Supplementary data**

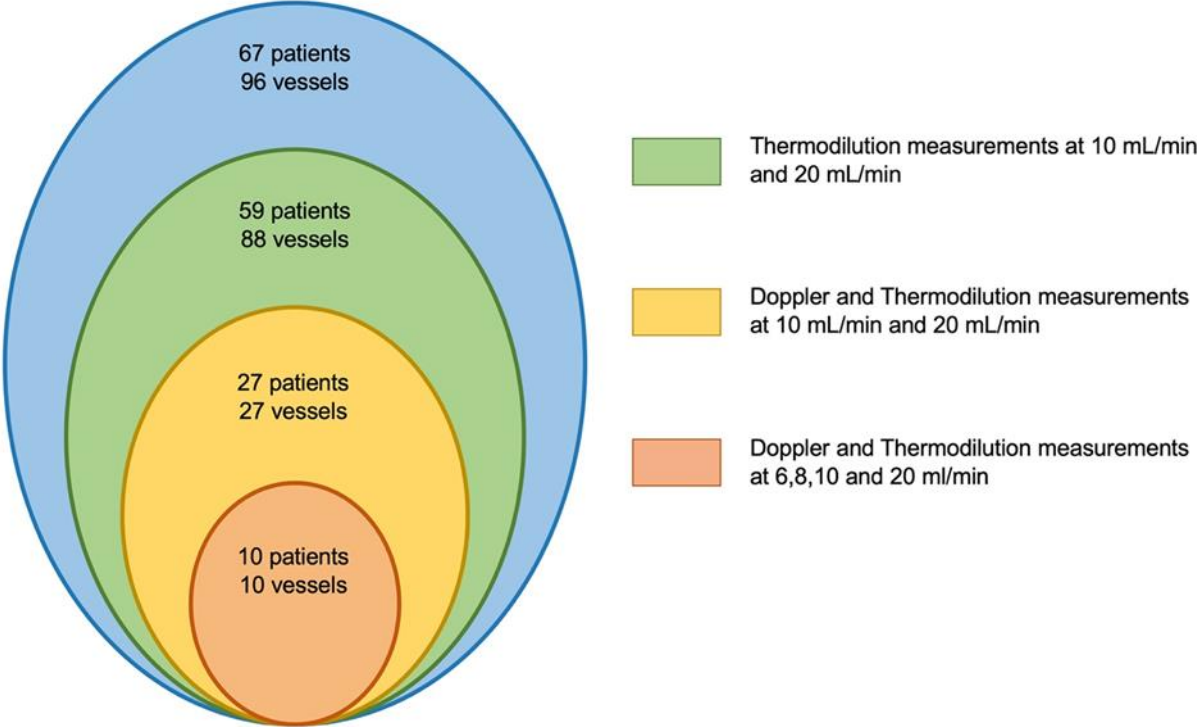

**Supplementary Figure 1.** Diagram displaying the numbers of patients and vessels analysed in the various subgroups of patients.

**Supplementary Table 1. Baseline characteristics.**

|                                        |                |
|----------------------------------------|----------------|
| Number of patients                     | 59             |
| Number of coronary arteries            | 88             |
| Male/female, n (%)                     | 53 (89)/6 (11) |
| Age, yrs (range)                       | 64 (30-85)     |
| LAD/LCx/RCA                            | 39/19/30       |
| Smokers, n (%)                         | 11 (18.6)      |
| Diabetes mellitus, n (%)               | 16 (27.1)      |
| Hypertension, n (%)                    | 23 (39)        |
| Dyslipidaemia, n (%)                   | 45 (76.3)      |
| Indications to coronary angiography, n |                |
| CCS1/CCS2/CCS3/CCS4                    | 35/8/2/2       |
| Control angiogram post PCI             | 7              |
| CT suspected for CAD                   | 3              |
| New-onset heart failure                | 1              |
| PFO                                    | 1              |
| Ejection fraction, n                   |                |
| >55%                                   | 52             |
| 35-55%                                 | 6              |
| <35%                                   | 1              |
| Medication, n (%)                      |                |
| ASA                                    | 37 (62.7)      |
| Other antiplatelet                     | 13 (22)        |
| Anticoagulant                          | 2 (3.5)        |
| ACE-I/ARBs                             | 16 (27.1)      |
| Calcium blockers                       | 7 (11.9)       |
| Statins                                | 38 (64.4)      |
| Beta-blockers                          | 13 (22)        |
| Nitrates                               | 4 (6.8)        |
| Insulin                                | 5 (8.5)        |
| OAD                                    | 7 (11.9)       |

ACE-I: angiotensin-converting enzyme inhibitors; ARBs: angiotensin II receptor blockers; ASA: acetylsalicylic acid; CAD: coronary artery disease; CCS: Canadian Cardiovascular Society grading of angina pectoris (class); LAD: left anterior descending coronary artery; LCx: left circumflex coronary artery; OAD: oral antidiabetic drugs; PFO: patent foramen ovale; RCA: right coronary artery
